# Supplementary material for: Overexpression of Murine Rnaset2 in a Colon Syngeneic Mouse Carcinoma Model Leads to Rebalance of Intra-Tumor M1/M2 Macrophage Ratio, Activation of T Cells, Delayed Tumor Growth, and Rejection
Source: MDPI journal article supplement (doi:10.3390/cancers12030717), 2020-03-18

# Supplementary Materials: Overexpression of Murine *Rnaset2* in a Colon Syngeneic Mouse Carcinoma Model Leads to Rebalance of Intra-Tumor M1/M2 Macrophage Ratio, Activation of T Cells, Delayed Tumor Growth, and Rejection

Annarosaria De Vito, Paola Orecchia, Enrica Balza, Daniele Reverberi, Debora Scaldaferri, Roberto Taramelli, Douglas M. Noonan, Francesco Acquati, and Lorenzo Mortara

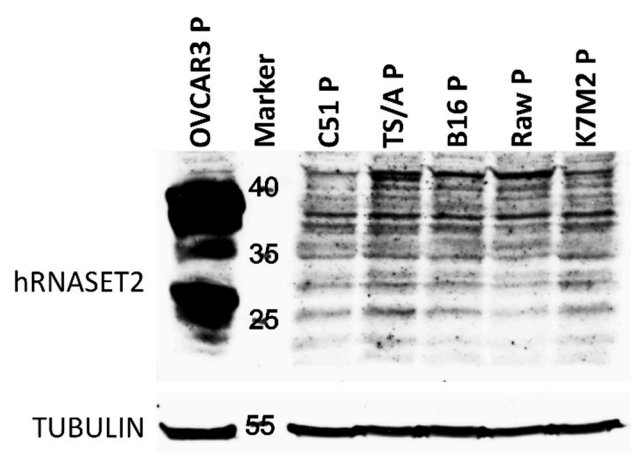

**Figure S1.** Immunoblot analysis of Rnaset2 in five parental murine tumor cell lines (including C51 and TS/A) using a polyclonal anti-human RNASET2 antibody which cross-reacts with the mouse protein [1]. The human OVCAR3 ovarian cancer-derived cell line, which expresses high endogenous RNASET2 protein, was included as a positive control. All murine cell lines tested are considered Rnaset2 negative, since all bands detected in the murine protein samples by the human anti-RNASET2 antibody represent non-specific products.

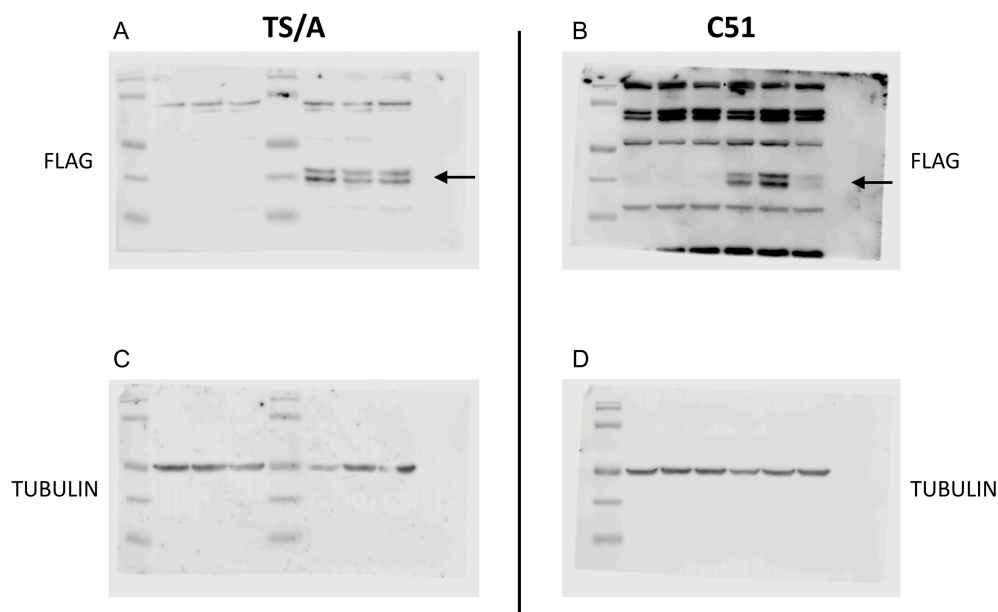

**Figure S2.** Whole-filter images of the immunoblot analysis for Rnaset2-FLAG expression in TS/A and C51 murine cell lines. Panel **A** and **B**: an intracellular lysate was analyzed for Rnaset2-FLAG expression in TS/A and C51 E and FL Rnaset2 clones, respectively. Panel **C** and **D**: the same filters were probed with anti-tubulin polyclonal antibody for normalization.

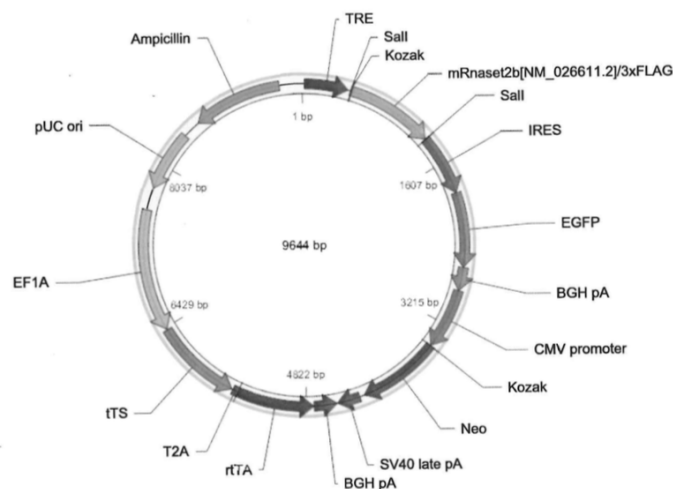

**Figure S3.** Schematic representation of the inducible vector from VectorBuilder Company.

## Reference

1. Campomenosi, P.; Salis, S.; Lindqvist, C.; Mariani, D.; Nordström, T.; Acquati, F.; Taramelli, R. Characterization of RNASET2, the first human member of the Rh/T2/S family of glycoproteins. *Arch. Biochem. Biophys.* **2006**, *449*, 17–26.

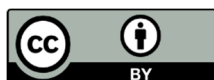

Supplement: s1 [file s1]
